# Supplementary material for: Esrrb Regulates Specific Feed-Forward Loops to Transit From Pluripotency Into Early Stages of Differentiation
Source: Front Cell Dev Biol. 2022 May 16;10:820255. doi: 10.3389/fcell.2022.820255 (PMC9149258; doi:10.3389/fcell.2022.820255)
Supplement: Supplementary file 7 [file Table6.xlsx]

## Sheet: Exiqon_miR Array
Table S6
List of significant microRNAs differentially expressed after ANOVA ratio and 0.05 Bonferroni correction in Esrrb knockdown time series
Index	Entrze Gene Symbol	Change in Variance Day1/Day0: :Day3/Day0	Change in Variance Day1/Day0: :Day5/Day0	Change in Variance Day3/Day0: :Day5/Day0	ANOVA p-value	Median Ratio Day 1:Day 0	Median Ratio Day 3:Day 0	Median Ratio Day 5:Day 0	Maximum Fold Increase	Maximum Fold Decrease
11	'mmu-miR-762'	1	1	1	2.44259e-09	1.21419	1.84038	2.86791	1.52	0.28
8	'mmu-miR-294*'	1	1	1	5.98983e-09	0.742262	0.655197	0.550953	-0.43	-0.86
16	'mmu-miR-292-5p'	1	1	1	3.62037e-08	0.726986	0.582367	0.466516	-0.46	-1.1
26	'mmu-miR-295*'	1	1	1	6.37725e-08	0.650671	0.426317	0.378929	-0.62	-1.4
32	'mmu-miR-708'	1	1	1	7.68455e-08	0.702222	0.496546	0.41466	-0.51	-1.27
55	'mmu-miR-291a-5p'	1	1	1	9.59222e-08	0.721965	0.659754	0.566442	-0.47	-0.82
46	'mmu-miR-154*'	0	1	1	1.15431e-07	0.895025	0.574349	0.469761	-0.16	-1.09
15	'mmu-miR-20b'	1	1	1	1.16495e-07	4.28709	3.09513	1.97247	2.1	0.98
45	mmu-miR-193'	0	1	1	1.2737e-07	0.993092	0.876606	1.71713	0.78	-0.19
38	'mmu-miR-7a'	1	1	1	1.27645e-07	0.817902	0.646176	0.582367	-0.29	-0.78
1	'mmu-miR-2137'	1	1	1	1.52414e-07	1.81504	3.29436	4.34694	2.12	0.86
24	'mmu-miR-210'	1	1	1	1.59192e-07	1.49485	2.46229	4.92458	2.3	0.58
6	'mmu-miR-293*'	1	1	1	1.63123e-07	0.668964	0.441351	0.334482	-0.58	-1.58
19	'mmu-miR-292-3p'	1	1	1	1.97079e-07	0.716978	0.624165	0.514057	-0.48	-0.96
13	'mmu-miR-805'	1	1	1	1.97577e-07	0.524858	0.271684	0.248273	-0.93	-2.01
2	'mmu-miR-2133'	0	1	1	2.40971e-07	1.17283	2.25012	2.54912	1.35	0.23
42	'mmu-miR-369-3p'	1	1	1	3.64852e-07	0.812252	0.659754	0.742262	-0.3	-0.6
30	'mmu-miR-294'	1	1	1	3.66704e-07	0.747425	0.673617	0.558644	-0.42	-0.84
3	'mmu-miR-1894-3p'	1	1	1	5.07501e-07	1.44393	2.47942	2.41162	1.31	0.53
28	'mmu-miR-672'	1	1	1	6.47407e-07	0.692555	0.594604	0.447513	-0.53	-1.16
20	'mmu-miR-291b-5p'	1	1	1	7.0676e-07	0.752623	0.641713	0.574349	-0.41	-0.8
66	'mmu-miR-710'	1	1	1	7.69836e-07	1.19748	1.82766	1.85318	0.89	0.26
18	'mmu-miR-1900'	1	1	1	8.99684e-07	1.34723	2.02792	1.98618	1.02	0.43
31	'mmu-miR-323-3p'	1	1	1	1.05361e-06	0.823591	0.721965	0.570382	-0.28	-0.81
29	'mmu-miR-673-3p'	1	1	1	1.09757e-06	0.752623	0.655197	0.558644	-0.41	-0.84
50	'mmu-miR-431'	1	1	1	1.15154e-06	0.773782	0.641713	0.795536	-0.33	-0.64
5	'mmu-miR-503'	1	1	1	1.23014e-06	1.54756	1.8025	1.71713	0.85	0.63
22	'mmu-miR-1892'	1	1	1	1.25787e-06	1.42405	1.89212	1.86607	0.92	0.51
54	'mmu-miR-124'	1	1	1	1.31483e-06	0.628507	0.426317	0.411796	-0.67	-1.28
83	'mmu-miR-23a'	0	0	1	1.35522e-06	1.02101	1.08673	1.59107	0.67	0.03
74	'mmu-miR-363'	1	1	1	1.52578e-06	3.29436	2.36199	1.44393	1.72	0.53
47	'mmu-miR-328'	0	1	1	1.61543e-06	1.01396	1.17283	1.41421	0.5	0.02
63	'mmu-miR-293'	1	1	1	2.47151e-06	0.768438	0.619854	0.521233	-0.38	-0.94
39	'mmu-miR-183'	1	1	1	2.9378e-06	0.68302	0.550953	0.607097	-0.55	-0.86
25	'mmu-miR-337-3p'	1	1	1	3.3097e-06	0.858565	0.702222	0.76313	-0.22	-0.51
43	'mmu-miR-495'	1	1	1	4.0573e-06	0.823591	0.716978	0.817902	-0.28	-0.48
65	'mmu-miR-409-3p'	1	1	1	4.10049e-06	0.852635	0.668964	0.668964	-0.23	-0.58
21	'mmu-miR-1186'	0	1	1	4.28052e-06	0.920188	0.624165	0.578344	-0.12	-0.79
77	'mmu-miR-351'	1	1	1	4.84261e-06	1.48452	2	2	1	0.57
106	'mmu-miR-551b'	1	1	1	5.05504e-06	1.37554	1.56917	1.38511	0.65	0.46
71	'mmu-miR-291a-3p'	1	1	1	5.09884e-06	0.784584	0.558644	0.521233	-0.35	-0.94
49	'mmu-miR-335-5p'	1	1	1	5.16826e-06	0.840896	0.570382	0.562529	-0.25	-0.83
120	'mmu-miR-92a'	0	0	1	5.60224e-06	1.08673	0.926588	0.747425	0.12	-0.42
10	'mmu-miR-674'	1	1	1	6.09213e-06	0.747425	0.641713	0.707107	-0.42	-0.64
160	'mmu-miR-23b'	0	0	1	6.18506e-06	0.926588	0.959264	1.34723	0.43	-0.11
62	'mmu-miR-434-3p'	1	1	1	6.26741e-06	0.90125	0.757858	0.870551	-0.15	-0.4
88	'mmu-miR-30b'	1	1	1	6.59377e-06	0.747425	0.664343	0.876606	-0.19	-0.59
79	'mmu-miR-677'	1	1	1	6.82195e-06	0.835088	0.712025	0.646176	-0.26	-0.63
139	'mmu-miR-191'	1	1	0	6.86438e-06	0.773782	0.678302	1.02101	0.03	-0.56
99	'mmu-miR-18b'	1	1	0	7.06078e-06	2.01391	1.34723	0.858565	1.01	-0.22
37	'mmu-miR-2132'	1	1	1	7.5819e-06	1.7411	3.22657	2.9897	1.69	0.8
48	'mmu-miR-691'	0	1	1	8.03697e-06	0.888843	0.543367	0.444421	-0.17	-1.17
148	'mmu-miR-382'	1	1	0	8.67621e-06	0.82932	0.773782	0.972655	-0.04	-0.37
7	mmu-miR-200b'	1	1	1	9.22302e-06	1.22264	1.18921	1.8025	0.85	0.25
52	'mmu-miR-543'	1	1	1	1.04183e-05	0.858565	0.664343	0.707107	-0.22	-0.59
155	'mmu-miR-24'	1	1	1	1.07051e-05	0.82932	0.90125	1.23971	0.31	-0.27
70	'mmu-miR-2144'	1	1	1	1.12426e-05	1.7411	2	1.90528	1	0.8
93	'mmu-miR-763'	1	1	1	1.12961e-05	1.37554	1.95884	1.97247	0.98	0.46
59	'mmu-miR-2138'	1	1	1	1.13419e-05	1.93187	2.82843	2.77022	1.5	0.95
140	'mmu-miR-882'	0	1	1	1.18309e-05	1.06437	1.52626	1.56917	0.65	0.09
58	'mmu-miR-2146'	1	1	1	1.25217e-05	1.81504	2.80889	2.39496	1.49	0.86
142	'mmu-miR-26b'	0	0	1	1.35009e-05	0.939523	0.895025	1.49485	0.58	-0.16
33	mmu-miR-150'	1	1	1	1.4058e-05	1.24833	1.52626	1.34723	0.61	0.32
12	'mmu-miR-184'	1	1	1	1.43011e-05	1.7411	2.54912	2.51403	1.35	0.8
61	'mmu-miR-129-5p'	1	1	1	1.46314e-05	1.31039	1.77769	1.68179	0.83	0.39
144	'mmu-miR-18a'	0	1	1	1.48219e-05	1.1487	0.712025	0.61132	0.2	-0.71
60	'mmu-miR-706'	1	1	1	1.55293e-05	0.697372	0.570382	0.503478	-0.52	-0.99
89	'mmu-miR-340-5p'	0	1	1	1.59431e-05	0.959264	0.721965	0.655197	-0.06	-0.61
9	'mmu-miR-21*'	1	1	1	1.62591e-05	1.6245	1.94531	1.81504	0.96	0.7
35	'mmu-miR-467a*'	0	0	1	1.80608e-05	0.858565	0.888843	1.59107	0.67	-0.22
36	'mmu-miR-467d*'	0	0	1	1.80608e-05	0.858565	0.888843	1.59107	0.67	-0.22
75	'mmu-miR-376b'	1	1	1	1.87943e-05	0.846745	0.570382	0.532185	-0.24	-0.91
14	'mmu-miR-494'	1	1	1	2.03984e-05	1.98618	2.36199	1.49485	1.24	0.58
67	'mmu-miR-2143'	1	1	1	2.07766e-05	1.55833	2.21914	2.05623	1.15	0.64
64	'mmu-miR-2135'	1	1	1	2.18683e-05	1.72907	2.32947	2.31338	1.22	0.79
27	'mmu-miR-712'	1	1	1	2.2699e-05	0.673617	0.646176	0.363493	-0.57	-1.46
69	'mmu-miR-96'	1	1	1	2.29175e-05	0.655197	0.524858	0.578344	-0.61	-0.93
103	'mmu-miR-711'	0	1	1	2.34378e-05	1.24833	1.69349	1.97247	0.98	0.32
34	'mmu-miR-379'	1	1	1	2.43688e-05	0.907519	0.752623	0.846745	-0.14	-0.41
82	'mmu-let-7e'	0	1	1	2.46941e-05	0.858565	0.535887	0.450625	-0.22	-1.15
40	'mmu-miR-374'	1	1	1	2.61978e-05	1.23971	1.12506	1.56917	0.65	0.17
115	'mmu-miR-688'	1	1	1	2.68108e-05	1.20581	1.39474	1.44393	0.53	0.27
78	'mmu-miR-1971'	1	1	1	2.82358e-05	1.25701	1.49485	1.38511	0.58	0.33
44	'mmu-miR-2134'	1	1	1	2.92266e-05	2.14355	2.96905	2.14355	1.57	1.1
189	'mmu-miR-17'	1	0	1	2.99341e-05	1.23971	0.913831	0.773782	0.31	-0.37
123	'mmu-miR-434-5p'	1	1	1	3.04546e-05	0.835088	0.673617	0.726986	-0.26	-0.57
117	'mmu-miR-106b'	1	1	1	3.403e-05	0.840896	0.707107	0.768438	-0.25	-0.5
76	'mmu-miR-709'	0	1	1	3.41734e-05	0.823591	0.510506	0.392292	-0.28	-1.35
108	'mmu-miR-26a'	0	0	1	3.61847e-05	0.913831	0.972655	1.77769	0.83	-0.13
84	'mmu-miR-542-5p'	1	1	1	3.66094e-05	1.40444	1.89212	1.84038	0.92	0.49
110	'mmu-miR-30c'	1	1	1	3.87298e-05	0.712025	0.602904	0.795536	-0.33	-0.73
122	'mmu-miR-674*'	1	1	1	3.97511e-05	0.806642	0.732043	0.835088	-0.26	-0.45
166	'mmu-miR-205'	0	0	1	4.02597e-05	1.28343	1.29235	2.92817	1.55	0.36
143	'mmu-miR-125b-5p'	1	1	1	4.31131e-05	0.784584	0.659754	0.659754	-0.35	-0.6
129	'mmu-miR-25'	1	1	1	4.60654e-05	0.835088	0.742262	0.80107	-0.26	-0.43
81	'mmu-miR-99b'	0	0	1	4.76735e-05	1.06437	1.09429	1.37554	0.46	0.09
126	'mmu-miR-29a'	0	0	1	4.80872e-05	1.04972	0.965936	1.3566	0.44	-0.05
17	'mmu-miR-200c'	0	0	1	4.91312e-05	1.04972	1.12506	1.79005	0.84	0.07
125	'mmu-miR-106a'	1	0	0	4.92778e-05	1.3566	1.06437	0.895025	0.44	-0.16
147	'mmu-miR-300*'	0	1	1	5.14523e-05	1.11729	1.48452	1.52626	0.61	0.16
97	'mmu-let-7f*'	1	1	1	5.27498e-05	1.38511	1.31951	1.40444	0.49	0.4
113	'mmu-miR-339-3p'	1	1	1	5.44726e-05	1.40444	1.56917	2.02792	1.02	0.49
169	'mmu-miR-1957'	0	1	1	6.36639e-05	1.01396	0.68302	0.668964	0.02	-0.58
109	'mmu-miR-714'	0	1	1	6.45962e-05	1.36604	2.08493	1.87905	1.06	0.45
107	'mmu-miR-290-3p'	0	1	1	6.89065e-05	1.13288	1.53688	1.65864	0.73	0.18
41	'mmu-miR-295'	1	1	1	6.90855e-05	0.732043	0.655197	0.678302	-0.45	-0.61
127	'mmu-miR-125a-5p'	0	0	1	7.39366e-05	0.946058	1.06437	1.38511	0.47	-0.08
111	'mmu-miR-499'	0	0	1	7.93848e-05	1.07923	1.27456	4.19887	2.07	0.11
174	'mmu-miR-32'	0	1	0	8.06389e-05	0.986233	0.469761	0.757858	-0.02	-1.09
162	'mmu-miR-467e*'	0	0	1	8.1201e-05	0.888843	1.08673	1.41421	0.5	-0.17
80	mmu-miR-182'	1	1	1	8.22401e-05	0.68302	0.574349	0.678302	-0.55	-0.8
204	'mmu-miR-22'	1	0	1	8.23716e-05	0.673617	0.795536	1.47427	0.56	-0.57
86	'mmu-miR-2141'	1	1	1	8.74733e-05	1.72907	2.51403	2.2974	1.33	0.79
4	'mmu-miR-455'	1	1	1	9.26592e-05	1.31039	1.38511	2.26577	1.18	0.39
134	'mmu-miR-721'	1	1	1	9.37136e-05	1.23971	1.42405	1.55833	0.64	0.31
138	'mmu-miR-92a*'	1	1	1	9.39097e-05	1.75321	1.34723	1.29235	0.81	0.37
114	'mmu-miR-93'	1	1	1	9.50157e-05	0.823591	0.716978	0.757858	-0.28	-0.48
112	'mmu-miR-19b'	1	0	0	9.89282e-05	1.38511	0.888843	0.882703	0.47	-0.18
98	'mmu-miR-320'	0	0	1	0.000102876	0.97942	0.933033	1.85318	0.89	-0.1
94	'mmu-miR-302a'	1	1	1	0.000105159	2.09943	2.67586	1.70527	1.42	0.77
211	'mmu-miR-20a'	0	1	1	0.000106228	1.12506	0.747425	0.732043	0.17	-0.45
91	'mmu-miR-713'	1	1	1	0.000112362	1.28343	1.45397	1.51572	0.6	0.36
85	'mmu-miR-467b*'	0	0	1	0.000121511	0.864537	0.876606	1.33793	0.42	-0.21
68	'mmu-miR-874'	1	1	1	0.000124784	1.27456	1.42405	1.26576	0.51	0.34
56	'mmu-miR-127'	0	1	1	0.000145841	0.90125	0.737135	0.846745	-0.15	-0.44
164	'mmu-miR-29b'	0	0	1	0.000155933	1.09429	0.895025	1.33793	0.42	-0.16
87	'mmu-miR-467g'	0	0	1	0.000167646	0.926588	1.00696	1.24833	0.32	-0.11
92	'mmu-miR-302d'	1	1	0	0.000171114	2.2974	2.39496	1.50525	1.26	0.59
173	'mmu-miR-878-3p'	1	1	1	0.000172706	0.732043	0.678302	0.521233	-0.45	-0.94
128	'mmu-miR-877'	0	1	1	0.000175803	1.05702	1.30134	1.40444	0.49	0.08
170	'mmu-miR-690'	0	1	1	0.000182921	1.06437	1.13288	1.31951	0.4	0.09
131	'mmu-miR-302a*'	1	1	0	0.000187224	1.53688	1.48452	0.812252	0.62	-0.3
141	'mmu-miR-24-1*'	1	1	1	0.000210203	0.773782	0.707107	0.702222	-0.37	-0.51
163	'mmu-miR-381'	0	1	1	0.000214795	0.920188	0.747425	0.80107	-0.12	-0.42
149	'mmu-miR-302c*'	1	1	0	0.000233498	1.67018	1.46409	0.986233	0.74	-0.02
251	'mmu-miR-140*'	0	1	0	0.000237525	0.913831	0.768438	1.13288	0.18	-0.38
151	'mmu-miR-326'	0	1	1	0.000246259	1.28343	1.75321	1.56917	0.81	0.36
132	'mmu-miR-329'	1	1	1	0.000247263	0.82932	0.82932	0.907519	-0.14	-0.27
223	'mmu-miR-19a'	0	1	1	0.000250845	1.17283	0.63728	0.578344	0.23	-0.79
53	'mmu-miR-302b'	1	1	0	0.000273118	2.04202	2.04202	1.23114	1.03	0.3
95	'mmu-miR-770-3p'	1	1	1	0.000273487	1.55833	1.49485	1.19748	0.64	0.26
249	'mmu-miR-466f-3p'	1	0	1	0.000283592	0.876606	1.06437	1.23114	0.3	-0.19
150	'mmu-miR-27b'	0	1	0	0.000288959	0.913831	0.817902	0.993092	-0.01	-0.29
118	'mmu-miR-30e'	1	1	1	0.000311121	0.779165	0.602904	0.779165	-0.36	-0.73
101	'mmu-miR-485*'	1	1	1	0.000314764	0.90125	0.82932	0.752623	-0.15	-0.41
135	'mmu-miR-669f'	0	0	1	0.000328779	0.823591	0.965936	1.38511	0.47	-0.28
194	'mmu-miR-467b'	1	0	1	0.000339077	0.779165	0.784584	1.25701	0.33	-0.36
175	'mmu-miR-376a'	0	1	0	0.000349754	0.972655	0.63728	0.812252	-0.04	-0.65
236	'mmu-miR-16'	0	0	1	0.000375348	0.90125	0.876606	1.3566	0.44	-0.19
242	'mmu-miR-301a'	0	0	1	0.000396246	0.946058	0.82932	1.53688	0.62	-0.27
191	'mmu-miR-467f'	0	0	1	0.000399477	0.959264	1.11729	1.33793	0.42	-0.06
246	'mmu-miR-431*'	0	1	1	0.000415996	1.04247	0.632878	0.664343	0.06	-0.66
137	'mmu-miR-410'	0	1	1	0.000417248	0.90125	0.668964	0.888843	-0.15	-0.58
176	'mmu-miR-214'	0	1	1	0.000417588	1.11729	1.25701	1.19748	0.33	0.16
200	'mmu-miR-666-5p'	1	1	1	0.000457413	1.30134	1.40444	1.48452	0.57	0.38
177	'mmu-miR-377'	0	1	1	0.000506839	0.913831	0.673617	0.779165	-0.13	-0.57
186	'mmu-miR-339-5p'	0	0	1	0.00051848	1	1	1.38511	0.47	0
23	'mmu-miR-103'	0	0	1	0.000542012	0.972655	0.939523	1.47427	0.56	-0.09
188	'mmu-miR-106b*'	0	1	1	0.000590756	0.864537	0.678302	0.768438	-0.21	-0.56
116	'mmu-miR-675-5p'	0	1	1	0.000632826	1.04247	1.38511	1.23971	0.47	0.06
181	'mmu-miR-148b'	0	1	1	0.000637913	0.90125	0.687771	0.795536	-0.15	-0.54
105	'mmu-miR-2140'	0	1	1	0.000665318	1.12506	1.23971	1.30134	0.38	0.17
179	'mmu-miR-30a'	0	1	0	0.000672133	0.882703	0.712025	0.882703	-0.18	-0.49
145	'mmu-miR-487b'	0	1	1	0.000705888	0.939523	0.646176	0.528509	-0.09	-0.92
165	'mmu-miR-181d'	0	1	1	0.000722662	0.888843	0.615572	0.697372	-0.17	-0.7
215	'mmu-miR-101b'	0	1	0	0.000782101	1.07177	0.752623	0.913831	0.1	-0.41
153	'mmu-miR-695'	1	1	1	0.000794007	1.23971	1.41421	1.31951	0.5	0.31
187	'mmu-miR-500'	0	0	1	0.000807527	0.952638	0.90125	1.53688	0.62	-0.15
133	'mmu-miR-693-5p'	0	1	1	0.000809808	0.959264	0.852635	0.76313	-0.06	-0.39
231	'mmu-miR-1949'	0	0	1	0.000825447	0.993092	0.939523	0.692555	-0.01	-0.53
161	mmu-miR-135b'	0	1	1	0.000908799	0.840896	0.624165	0.687771	-0.25	-0.68
136	'mmu-miR-290-5p'	1	1	1	0.000930917	0.882703	0.876606	0.806642	-0.18	-0.31
217	'mmu-miR-195'	0	1	0	0.000932842	0.933033	0.82932	0.920188	-0.1	-0.27
238	'mmu-miR-151-5p'	1	1	0	0.000933269	0.846745	0.784584	1.01396	0.02	-0.35
243	'mmu-miR-1274a'	0	1	1	0.000996951	1.04247	0.5	0.476319	0.06	-1.07
227	'mmu-miR-744'	0	1	1	0.00100203	1.04247	1.1487	1.32869	0.41	0.06
130	'mmu-miR-138*'	0	1	1	0.00109239	1.00696	0.784584	0.80107	0.01	-0.35
195	'mmu-miR-466a-3p'	0	0	0	0.00113208	0.835088	0.823591	1.23114	0.3	-0.28
196	'mmu-miR-466b-3p'	0	0	0	0.00113208	0.835088	0.823591	1.23114	0.3	-0.28
197	'mmu-miR-466c-3p'	0	0	0	0.00113208	0.835088	0.823591	1.23114	0.3	-0.28
198	'mmu-miR-466e-3p'	0	0	0	0.00113208	0.835088	0.823591	1.23114	0.3	-0.28
230	'mmu-miR-297a*/mmu-miR-297b-3p/mmu-miR-297c*'	1	0	0	0.00114025	0.870551	0.907519	1.10957	0.15	-0.2
102	'mmu-miR-1187'	0	1	1	0.00117511	0.920188	0.784584	0.712025	-0.12	-0.49
158	'mmu-miR-200a'	0	0	1	0.00122259	1.07177	1.04972	1.42405	0.51	0.07
214	'mmu-miR-30d'	1	1	1	0.00123746	0.650671	0.687771	0.668964	-0.54	-0.62
183	'mmu-miR-15b'	0	0	1	0.00133578	0.895025	0.895025	1.26576	0.34	-0.16
206	'mmu-miR-767'	1	1	1	0.00134899	0.784584	0.742262	0.632878	-0.35	-0.66
178	'mmu-miR-467e'	1	1	0	0.00140024	0.790041	0.779165	0.993092	-0.01	-0.36
154	'mmu-miR-1895'	0	1	1	0.00145762	1.11729	1.20581	1.29235	0.37	0.16
210	'mmu-let-7d*'	1	1	1	0.00146446	1.34723	1.37554	1.18921	0.46	0.25
228	'mmu-miR-1902'	0	1	1	0.00146455	0.926588	0.846745	0.76313	-0.11	-0.39
156	'mmu-miR-298'	0	0	1	0.00148616	0.946058	0.913831	1.36604	0.45	-0.13
90	'mmu-miR-130b'	1	1	1	0.00159146	0.882703	0.790041	0.858565	-0.18	-0.34
222	'mmu-miR-669b'	1	1	0	0.00162556	0.779165	0.707107	0.882703	-0.18	-0.5
96	'mmu-miR-1939'	0	1	1	0.00174085	0.852635	0.607097	0.535887	-0.23	-0.9
182	'mmu-miR-503*'	0	1	1	0.00175032	0.965936	0.876606	0.835088	-0.05	-0.26
220	'mmu-miR-376c'	0	1	1	0.00176508	0.926588	0.82932	0.823591	-0.11	-0.28
51	'mmu-miR-466e-5p'	0	1	1	0.00180168	0.993092	0.806642	0.752623	-0.01	-0.41
261	'mmu-miR-361'	0	0	1	0.00185335	0.952638	0.876606	1.17283	0.23	-0.19
171	'mmu-miR-375'	1	1	1	0.00185661	1.32869	1.22264	1.29235	0.41	0.29
201	'mmu-miR-429'	0	0	1	0.0018767	0.97942	1.06437	1.31039	0.39	-0.03
159	'mmu-miR-183*'	0	1	1	0.00195337	1.08673	1.23971	1.14076	0.31	0.12
100	'mmu-miR-1941-3p'	0	1	0	0.00195521	1.10957	1.21419	1.10957	0.28	0.15
289	'mmu-miR-466i'	1	0	0	0.0020419	0.852635	0.888843	1.07177	0.1	-0.23
203	'mmu-miR-296-3p'	0	1	0	0.00204728	0.933033	0.835088	0.952638	-0.07	-0.26
185	'mmu-miR-302c'	1	1	0	0.00207201	1.60214	1.71713	1.25701	0.78	0.33
290	'mmu-miR-92b'	1	0	0	0.00213261	1.17283	1.00696	0.907519	0.23	-0.14
209	'mmu-miR-411'	1	1	1	0.00218816	0.870551	0.80107	0.870551	-0.2	-0.32
255	'mmu-miR-669l'	0	1	0	0.00228688	0.823591	0.864537	1.07923	0.11	-0.28
180	'mmu-miR-135a'	0	1	1	0.00243349	0.920188	0.742262	0.779165	-0.12	-0.43
277	'mmu-miR-365'	0	0	1	0.00257667	0.946058	0.926588	1.12506	0.17	-0.11
234	'mmu-miR-466d-3p'	0	0	0	0.00259629	0.888843	0.835088	1.22264	0.29	-0.26
268	'mmu-miR-33'	1	0	0	0.00270319	1.67018	0.858565	1.36604	0.74	-0.22
218	'mmu-miR-669o'	1	1	0	0.00271889	0.790041	0.784584	1.03526	0.05	-0.35
293	'mmu-miR-107'	0	0	0	0.00306917	0.959264	0.952638	1.15669	0.21	-0.07
167	'mmu-miR-367'	1	0	0	0.00309172	2.58471	1.72907	1.18099	1.37	0.24
172	'mmu-miR-335-3p'	0	1	1	0.00317812	1.07177	1.13288	1.07923	0.18	0.1
229	'mmu-miR-130a'	0	1	0	0.0032712	0.97942	0.858565	1.00696	0.01	-0.22
273	'mmu-miR-141'	0	0	1	0.00330661	1	0.895025	1.37554	0.46	-0.16
219	'mmu-miR-411*'	0	1	0	0.0033463	0.972655	0.82932	0.97942	-0.03	-0.27
288	'mmu-miR-466g'	0	0	0	0.00338852	0.784584	0.779165	1.14076	0.19	-0.36
237	'mmu-miR-154'	0	1	0	0.00340033	0.959264	0.846745	0.972655	-0.04	-0.24
212	'mmu-miR-484'	1	1	1	0.00360229	0.835088	0.812252	0.817902	-0.26	-0.3
190	'mmu-miR-142-3p'	0	1	1	0.00367251	0.986233	0.716978	0.752623	-0.02	-0.48
294	'mmu-miR-101a'	0	0	0	0.00385896	1.23971	0.823591	1.28343	0.36	-0.28
285	'mmu-miR-705'	0	0	1	0.00392498	0.946058	1.04247	1.11729	0.16	-0.08
208	'mmu-miR-1946a'	1	1	1	0.00392594	0.806642	0.752623	0.76313	-0.31	-0.41
72	'mmu-miR-669e'	0	1	1	0.00398811	0.920188	0.795536	0.76313	-0.12	-0.39
193	'mmu-miR-669a'	1	1	0	0.00415601	0.812252	0.757858	0.907519	-0.14	-0.4
121	'mmu-miR-467a'	1	1	0	0.00419296	0.76313	0.737135	1.05702	0.08	-0.44
272	'mmu-miR-301b'	0	1	0	0.00429959	0.888843	0.757858	1.04972	0.07	-0.4
225	'mmu-miR-15a'	0	1	0	0.00467974	0.82932	0.712025	0.888843	-0.17	-0.49
157	'mmu-miR-668'	0	1	1	0.0049003	1	0.768438	0.726986	0	-0.46
224	'mmu-miR-30e*'	0	1	0	0.00518009	0.840896	0.707107	0.895025	-0.16	-0.5
286	'mmu-miR-466b-3-3p'	0	0	0	0.00518993	0.82932	0.806642	1.11729	0.16	-0.31
199	'mmu-miR-1946b'	1	1	1	0.00531654	0.721965	0.757858	0.726986	-0.4	-0.47
247	'mmu-miR-1839-3p'	1	0	1	0.00542653	1.18921	1.10957	1.23114	0.3	0.15
267	'mmu-miR-423-5p'	1	0	0	0.00547278	0.90125	0.959264	1.02811	0.04	-0.15
57	'mmu-miR-467h'	0	1	1	0.00553382	0.97942	0.784584	0.846745	-0.03	-0.35
205	'mmu-miR-299*'	0	1	1	0.00566475	1.09429	1.14076	1.21419	0.28	0.13
73	'mmu-miR-466b-5p'	0	1	1	0.00572104	0.972655	0.784584	0.747425	-0.04	-0.42
168	'mmu-miR-297c'	0	1	0	0.00574984	0.993092	0.742262	0.933033	-0.01	-0.43
257	'mmu-miR-380-3p'	0	1	1	0.00583433	0.959264	0.812252	0.876606	-0.06	-0.3
226	'mmu-miR-362-3p'	0	0	0	0.00587642	1.04972	0.870551	1.23114	0.3	-0.2
262	'mmu-miR-34c'	0	0	0	0.00604568	1.02811	0.913831	1.10191	0.14	-0.13
244	'mmu-miR-350'	1	0	0	0.00619872	0.876606	0.933033	1.00696	0.01	-0.19
281	'mmu-miR-27a'	0	0	0	0.00642802	0.920188	0.913831	1.07177	0.1	-0.13
152	'mmu-miR-1983'	0	1	1	0.00654016	0.926588	0.438303	0.574349	-0.11	-1.19
235	'mmu-miR-1931'	0	0	1	0.00674749	1.12506	1.04247	0.823591	0.17	-0.28
291	'mmu-miR-136*'	0	0	0	0.00768886	1.18921	0.773782	1.12506	0.25	-0.37
260	'mmu-miR-297a'	0	1	0	0.00784183	0.972655	0.768438	1.08673	0.12	-0.38
146	'mmu-miR-34c*'	0	1	1	0.00816793	1.20581	1.24833	1.31039	0.39	0.27
221	'mmu-miR-712*'	0	1	0	0.00936853	0.959264	1.45397	1.21419	0.54	-0.06
258	'mmu-miR-615-3p'	0	0	0	0.00964956	1.09429	1.1487	0.806642	0.2	-0.31
280	'mmu-miR-2183'	1	0	1	0.0111322	0.80107	0.939523	0.806642	-0.09	-0.32
254	'mmu-miR-467c'	0	1	0	0.0114309	0.846745	0.742262	1.02101	0.03	-0.43
250	'mmu-miR-665'	0	1	1	0.0115117	1.12506	1.18099	1.17283	0.24	0.17
275	'mmu-miR-341'	0	0	1	0.0115267	0.993092	0.959264	0.835088	-0.01	-0.26
317	'mmu-miR-342-3p'	0	0	0	0.0124142	0.926588	0.858565	1.11729	0.16	-0.22
216	'mmu-miR-490'	0	1	1	0.0127731	1.15669	1.23114	1.29235	0.37	0.21
278	'mmu-miR-24-2*'	0	0	1	0.0129974	1.18099	1.07923	1.61328	0.69	0.11
276	'mmu-miR-423-3p'	0	0	0	0.0131443	0.939523	0.97942	1.07177	0.1	-0.09
264	'mmu-miR-136'	0	0	0	0.0133008	1.26576	0.784584	1.12506	0.34	-0.35
256	'mmu-miR-541'	0	1	0	0.0143974	0.972655	0.864537	0.993092	-0.01	-0.21
252	'mmu-miR-1959'	0	1	0	0.0146898	1.02811	0.687771	0.846745	0.04	-0.54
202	'mmu-miR-1193'	0	0	1	0.0153424	1.02811	0.97942	0.817902	0.04	-0.29
283	'mmu-miR-207'	0	0	0	0.016002	1.18099	0.607097	0.707107	0.24	-0.72
233	'mmu-miR-325'	0	0	0	0.016029	1.08673	1.02811	0.907519	0.12	-0.14
119	'mmu-miR-1903'	1	0	0	0.0163995	1.18099	1.18099	0.993092	0.24	-0.01
271	'mmu-miR-1937c'	0	0	1	0.0179233	1.05702	0.594604	0.668964	0.08	-0.75
245	'mmu-miR-466h'	0	0	0	0.0188627	0.882703	0.920188	1.07923	0.11	-0.18
296	'mmu-miR-297b-5p'	0	1	0	0.0196652	0.986233	0.920188	1.04247	0.06	-0.12
279	'mmu-miR-669n'	0	0	0	0.0215197	0.965936	0.986233	1.1487	0.2	-0.05
239	'mmu-miR-299'	0	0	1	0.0229999	1.15669	1.20581	1.26576	0.34	0.21
240	'mmu-miR-669c'	0	0	0	0.0238479	1.00696	1.13288	1.31951	0.4	0.01
292	'mmu-miR-433'	0	1	0	0.025574	0.939523	0.812252	0.895025	-0.09	-0.3
298	'mmu-miR-1897-5p'	0	0	0	0.0256836	0.993092	1.17283	1.07923	0.23	-0.01
311	'mmu-miR-574-3p'	0	0	0	0.0271072	0.926588	1.01396	1.06437	0.09	-0.11
248	'mmu-miR-582-3p'	0	0	0	0.0287861	1.16473	0.607097	0.817902	0.22	-0.72
302	'mmu-miR-1935'	0	0	0	0.0326743	1	1.12506	0.965936	0.17	-0.05
253	'mmu-miR-667'	1	0	0	0.0334346	1.23114	1.23114	1.06437	0.3	0.09
265	'mmu-miR-433*'	0	1	0	0.0399561	1.03526	1.20581	1.10957	0.27	0.05
295	'mmu-miR-483*'	0	0	0	0.0409402	0.742262	0.946058	0.757858	-0.08	-0.43
192	'mmu-miR-466f-5p'	0	1	0	0.0437677	0.97942	0.80107	0.852635	-0.03	-0.32
213	'mmu-let-7b'	0	0	0	0.0503515	0.858565	1.56917	1.18921	0.65	-0.22
282	'mmu-miR-196a*'	0	0	1	0.0507499	0.907519	0.812252	0.721965	-0.14	-0.47
274	'mmu-miR-875-3p'	0	0	0	0.0509833	0.97942	0.888843	0.876606	-0.03	-0.19
301	'mmu-miR-1196'	0	0	0	0.0520166	1.01396	1.09429	1.09429	0.13	0.02
263	'mmu-let-7g'	0	0	0	0.0533946	0.702222	0.655197	0.624165	-0.51	-0.68
259	'mmu-miR-126-3p'	0	1	0	0.0555623	0.846745	0.726986	0.870551	-0.2	-0.46
270	'mmu-miR-883b-5p'	0	0	0	0.0579654	1.06437	1.15669	1.14076	0.21	0.09
316	'mmu-miR-2145'	0	0	0	0.0630576	0.986233	1.02101	0.888843	0.03	-0.17
313	'mmu-miR-34a'	0	0	0	0.0671345	0.926588	0.888843	1.04247	0.06	-0.17
307	'mmu-miR-138'	0	0	0	0.0731359	0.80107	0.757858	1.23114	0.3	-0.4
318	'mmu-miR-34b-3p'	0	0	0	0.0760888	1.10191	0.965936	0.946058	0.14	-0.08
104	'mmu-miR-466a-5p'	0	0	0	0.0779071	0.993092	0.895025	0.864537	-0.01	-0.21
299	'mmu-miR-685'	0	0	0	0.0793099	1.02811	1.02811	1.12506	0.17	0.04
303	'mmu-miR-673-5p'	0	0	0	0.0796563	0.882703	0.812252	0.806642	-0.18	-0.31
284	'mmu-miR-1958'	0	0	0	0.0799352	1.10957	1.15669	1.16473	0.22	0.15
287	'mmu-let-7a'	0	0	0	0.0832697	0.742262	0.619854	0.76313	-0.39	-0.69
312	'mmu-miR-1944'	0	0	0	0.085053	1.01396	1.08673	1.1487	0.2	0.02
310	'mmu-miR-465b-5p'	0	0	0	0.0920489	1	1.14076	0.939523	0.19	-0.09
305	'mmu-miR-17*'	0	0	0	0.0927498	1.1487	0.939523	0.895025	0.2	-0.16
304	'mmu-miR-883a-5p'	0	0	0	0.0956577	1.00696	1.07923	0.97942	0.11	-0.03
184	'mmu-miR-21'	0	0	0	0.0988369	1.15669	1.14076	1.39474	0.48	0.19
266	'mmu-miR-1192'	0	0	0	0.10792	0.882703	0.840896	0.840896	-0.18	-0.25
269	'mmu-miR-1954'	0	0	0	0.128488	1.10191	1.10957	1.10191	0.15	0.14
124	'mmu-miR-574-5p'	0	0	0	0.135217	0.97942	0.882703	0.895025	-0.03	-0.18
232	'mmu-miR-468'	0	0	0	0.136911	0.946058	0.90125	0.82932	-0.08	-0.27
319	'mmu-miR-715'	0	0	0	0.146858	0.806642	1.06437	0.907519	0.09	-0.31
297	'mmu-miR-185'	0	0	0	0.157432	0.870551	0.90125	1.10191	0.14	-0.2
241	'mmu-miR-466c-5p'	0	0	0	0.176992	1.04247	0.933033	0.959264	0.06	-0.1
207	'mmu-miR-345-5p'	0	0	0	0.183406	1.04972	1.13288	1.18921	0.25	0.07
308	'mmu-miR-378'	0	0	0	0.196979	0.959264	0.933033	1.12506	0.17	-0.1
306	'mmu-miR-720'	0	0	0	0.226692	1.21419	0.768438	1.06437	0.28	-0.38
315	'mmu-miR-125b-3p'	0	0	0	0.230746	0.933033	1.12506	1.04247	0.17	-0.1
322	'mmu-miR-664'	0	0	0	0.253181	0.97942	1.02101	0.933033	0.03	-0.1
329	'mmu-miR-300'	0	0	0	0.299109	1.07923	1	0.972655	0.11	-0.04
326	'mmu-miR-30b*'	0	0	0	0.319992	1.02101	1.05702	0.972655	0.08	-0.04
309	'mmu-miR-669m'	0	0	0	0.334071	0.972655	0.895025	0.895025	-0.04	-0.16
327	'mmu-miR-872*'	0	0	0	0.355226	1.21419	1.02101	0.993092	0.28	-0.01
314	'mmu-miR-31'	0	0	0	0.373188	1.23971	1.23114	1.13288	0.31	0.18
323	'mmu-miR-1937a'	0	0	0	0.380078	1.07177	0.726986	0.870551	0.1	-0.46
324	'mmu-miR-1937b'	0	0	0	0.380078	1.07177	0.726986	0.870551	0.1	-0.46
325	'mmu-miR-450a-5p'	0	0	0	0.40343	0.888843	0.876606	0.959264	-0.06	-0.19
328	'mmu-miR-296-5p'	0	0	0	0.420713	0.952638	1.06437	1.04247	0.09	-0.07
321	'mmu-miR-669i'	0	0	0	0.448035	1.00696	0.876606	0.926588	0.01	-0.19
320	'mmu-miR-466d-5p'	0	0	0	0.506617	0.97942	0.986233	0.920188	-0.02	-0.12
300	'mmu-miR-1952'	0	0	0	0.542285	1.08673	1.10957	1.01396	0.15	0.02
331	'mmu-miR-1929'	0	0	0	0.544483	1.00696	1.00696	0.97942	0.01	-0.03
330	'mmu-miR-881*'	0	0	0	0.652837	0.97942	0.97942	0.959264	-0.03	-0.06
332	'mmu-miR-485'	0	0	0	0.862239	0.933033	0.972655	0.959264	-0.04	-0.1

## Sheet: Venny Fig 2E
input	input	output
Esrrb (55) (Sevilla et al 2021)	ANOVA 125 miR significantly changed	18 common elements in "Esrrb ChiP-Seq" and "Anova 125 miRNAs significantly change":
mmu-mir-692-1	mmu-mir-762	mmu-mir-150
mmu-mir-290	mmu-mir-294*	mmu-mir-713
mmu-mir-150	mmu-mir-292-5p	mmu-mir-688
mmu-mir-142	mmu-mir-295*	mmu-mir-191
mmu-mir-129-1	mmu-mir-708	mmu-mir-22
mmu-mir-124-2	mmu-mir-291a-5p	mmu-mir-99b
mmu-mir-130a	mmu-mir-154*	mmu-mir-210
mmu-mir-713	mmu-mir-20b	mmu-mir-183
mmu-mir-135b	mmu-mir-193	mmu-mir-205
mmu-mir-124-1	mmu-mir-7a	mmu-mir-106b
mmu-mir-124-3	mmu-mir-2137	mmu-mir-762
mmu-mir-196b	mmu-mir-210	mmu-mir-193
mmu-mir-137	mmu-mir-293*	mmu-mir-320
mmu-mir-688	mmu-mir-292-3p	mmu-mir-182
mmu-mir-191	mmu-mir-805	mmu-mir-32
mmu-mir-22	mmu-mir-2133	mmu-mir-711
mmu-mir-298	mmu-mir-369-3p	mmu-mir-26b
mmu-mir-99b	mmu-mir-294	mmu-mir-499
mmu-mir-760	mmu-mir-1894-3p
mmu-mir-210	mmu-mir-672
mmu-let-7b	mmu-mir-291b-5p
mmu-mir-130b	mmu-mir-710
mmu-mir-700	mmu-mir-1900
mmu-mir-183	mmu-mir-323-3p
mmu-mir-205	mmu-mir-673-3p
mmu-mir-106b	mmu-mir-431
mmu-mir-152	mmu-mir-503
mmu-mir-181d	mmu-mir-1892
mmu-mir-212	mmu-mir-124
mmu-mir-762	mmu-mir-23a
mmu-let-7g	mmu-mir-363
mmu-mir-181c	mmu-mir-328
mmu-mir-128-2	mmu-mir-293
mmu-mir-141	mmu-mir-183
mmu-mir-291a	mmu-mir-337-3p
mmu-mir-670	mmu-mir-495
mmu-mir-9-3	mmu-mir-409-3p
mmu-mir-125a	mmu-mir-1186
mmu-mir-185	mmu-mir-351
mmu-mir-187	mmu-mir-551b
mmu-mir-193	mmu-mir-291a-3p
mmu-mir-207	mmu-mir-335-5p
mmu-mir-320	mmu-mir-92a
mmu-mir-21	mmu-mir-674
mmu-mir-568	mmu-mir-23b
mmu-mir-9-1	mmu-mir-434-3p
mmu-mir-182	mmu-mir-30b
mmu-mir-32	mmu-mir-677
mmu-mir-711	mmu-mir-191
mmu-mir-761	mmu-mir-18b
mmu-mir-7b	mmu-mir-2132
mmu-mir-92b	mmu-mir-691
mmu-mir-26b	mmu-mir-382
mmu-mir-346	mmu-mir-200b
mmu-mir-499	mmu-mir-543
	mmu-mir-24
	mmu-mir-2144
	mmu-mir-763
	mmu-mir-2138
	mmu-mir-882
	mmu-mir-2146
	mmu-mir-26b
	mmu-mir-150
	mmu-mir-184
	mmu-mir-129-5p
	mmu-mir-18a
	mmu-mir-706
	mmu-mir-340-5p
	mmu-mir-21*
	mmu-mir-467a*
	mmu-mir-467d*
	mmu-mir-376b
	mmu-mir-494
	mmu-mir-2143
	mmu-mir-2135
	mmu-mir-712
	mmu-mir-96
	mmu-mir-711
	mmu-mir-379
	mmu-let-7e
	mmu-mir-374
	mmu-mir-688
	mmu-mir-1971
	mmu-mir-2134
	mmu-mir-17
	mmu-mir-434-5p
	mmu-mir-106b
	mmu-mir-709
	mmu-mir-26a
	mmu-mir-542-5p
	mmu-mir-30c
	mmu-mir-674*
	mmu-mir-205
	mmu-mir-125b-5p
	mmu-mir-25
	mmu-mir-99b
	mmu-mir-29a
	mmu-mir-200c
	mmu-mir-106a
	mmu-mir-300*
	mmu-let-7f*
	mmu-mir-339-3p
	mmu-mir-1957
	mmu-mir-714
	mmu-mir-290-3p
	mmu-mir-295
	mmu-mir-125a-5p
	mmu-mir-499
	mmu-mir-32
	mmu-mir-467e*
	mmu-mir-182
	mmu-mir-22
	mmu-mir-2141
	mmu-mir-455
	mmu-mir-721
	mmu-mir-92a*
	mmu-mir-93
	mmu-mir-19b
	mmu-mir-320
	mmu-mir-302a
	mmu-mir-20a
	mmu-mir-713
	mmu-mir-467b*
	mmu-mir-874
	mmu-mir-127

## Sheet: Venny Fig 2F
	Input	Input	Output
	Esrrb unique targets from Fig 2C (29)	ANOVA Mirs (125)	Merged (11)
	mmu-mir-692-1	mmu-mir-762	mmu-mir-713
	mmu-mir-142	mmu-mir-294*	mmu-mir-688
	mmu-mir-713	mmu-mir-292-5p	mmu-mir-99b
	mmu-mir-196b	mmu-mir-295*	mmu-mir-210
	mmu-mir-137	mmu-mir-708	mmu-mir-106b
	mmu-mir-688	mmu-mir-291a-5p	mmu-mir-762
	mmu-mir-99b	mmu-mir-154*	mmu-mir-193
	mmu-mir-210	mmu-mir-20b	mmu-mir-320
	mmu-let-7b	mmu-mir-193	mmu-mir-32
	mmu-mir-130b	mmu-mir-7a	mmu-mir-711
	mmu-mir-700	mmu-mir-2137	mmu-mir-499
	mmu-mir-106b	mmu-mir-210
	mmu-mir-762	mmu-mir-293*
	mmu-mir-128-2	mmu-mir-292-3p
	mmu-mir-670	mmu-mir-805
	mmu-mir-9-3	mmu-mir-2133
	mmu-mir-125a	mmu-mir-369-3p
	mmu-mir-185	mmu-mir-294
	mmu-mir-187	mmu-mir-1894-3p
	mmu-mir-193	mmu-mir-672
	mmu-mir-207	mmu-mir-291b-5p
	mmu-mir-320	mmu-mir-710
	mmu-mir-21	mmu-mir-1900
	mmu-mir-9-1	mmu-mir-323-3p
	mmu-mir-32	mmu-mir-673-3p
	mmu-mir-711	mmu-mir-431
	mmu-mir-761	mmu-mir-503
	mmu-mir-346	mmu-mir-1892
	mmu-mir-499	mmu-mir-124
		mmu-mir-23a
		mmu-mir-363
		mmu-mir-328
		mmu-mir-293
		mmu-mir-183
		mmu-mir-337-3p
		mmu-mir-495
		mmu-mir-409-3p
		mmu-mir-1186
		mmu-mir-351
		mmu-mir-551b
		mmu-mir-291a-3p
		mmu-mir-335-5p
		mmu-mir-92a
		mmu-mir-674
		mmu-mir-23b
		mmu-mir-434-3p
		mmu-mir-30b
		mmu-mir-677
		mmu-mir-191
